# Supplementary material
Source: PubMed Central journal article supplement (PMC4417394)
Supplement: NIHMS672390-supplement-1.pdf [file NIHMS672390-supplement-1.pdf]

# Supplementary Figure 1

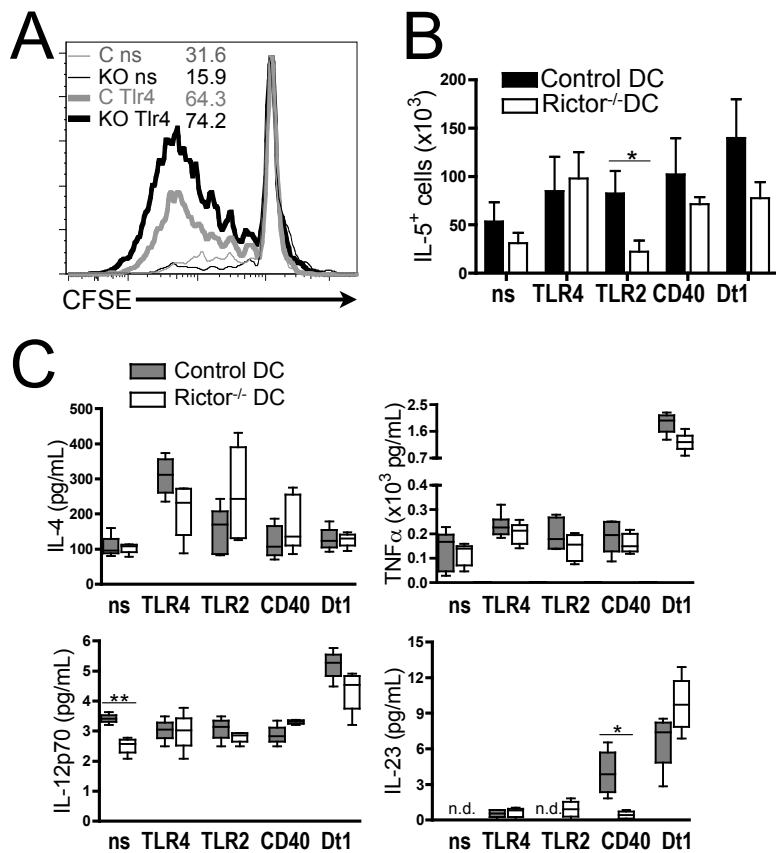

**Supplementary Figure 1.**

**TLR4-stimulated Rictor<sup>-/-</sup> DC promote enhanced T cell proliferation, without expanding Th2 cells.** (A) Representative histogram of proliferating T cells co-cultured with DC for 4d. Proliferation percentages are shown for each condition. (B) Non-stimulated (ns), TLR4/2-, CD40- or Dectin-1-stimulated DC from WT or Rictor<sup>-/-</sup> mice were used as stimulators of CD3<sup>+</sup> BALB/c T cells in 4d CFSE-MLR. Data show absolute numbers of IL-5-producing CD4<sup>+</sup> T cells. Bars are means + 1SD of n = 3-6 independent experiments. (C) Cytokines in MLR supernatants were assessed by cytokine bead array. Data are from n = 3-4 independent experiments. n.d. = not detected. \*  $P < 0.05$ , \*\*  $P < 0.01$ .
